# Supplementary material for: Characterization of the Biomass Degrading Enzyme GuxA from Acidothermus cellulolyticus
Source: MDPI journal article supplement (doi:10.3390/ijms23116070), 2022-05-28
Supplement: s1 [file s1]

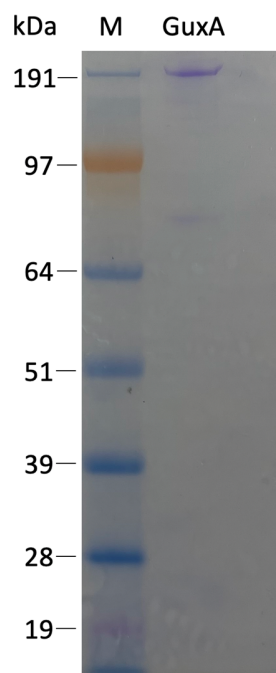

Figure S1: SDS-PAGE gel stained with Coomassie stain showing the purification product isolated after Ni-NTA affinity and HiLoad 16/600 Superdex 200 size exclusion purification in lane 2, Invitrogen™ SeeBlue™ Plus2 Pre-stained Standard in lane 1.

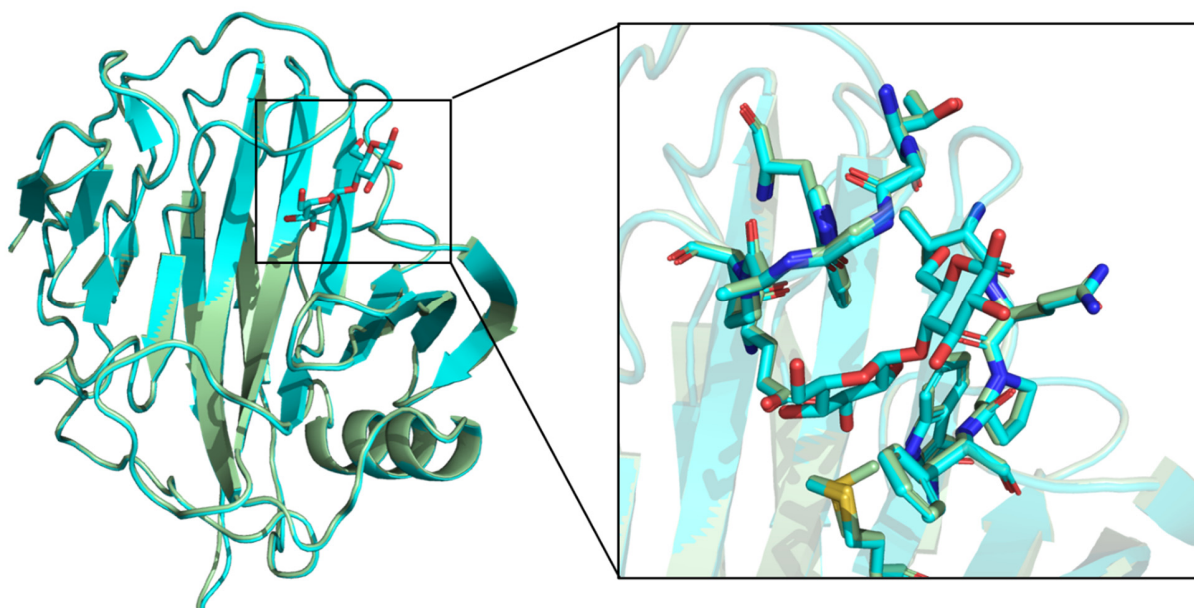

Figure S2. Alignment of GH12 with (green) and without cellobiose (cyan). Inset is a zoomed in view of the cellobiose with residues within 4 Å of the ligand represented as sticks. The representations together show the absence of any rearrangement of the structure on binding of cellulose at the whole-enzyme level and at the level of the residues that are directly involved in binding the substrate.

Table S1: Crystallography data collection and refinement statistics.

| <b>Data collection and refinement statistics.</b> |                                    |                                                        |
|---------------------------------------------------|------------------------------------|--------------------------------------------------------|
|                                                   | <b>GuxA GH12 domain<br/>– 7MKR</b> | <b>GuxA GH12 domain bound<br/>to cellobiose – 7MKS</b> |
| <b>Data collection</b>                            |                                    |                                                        |
| Space group                                       | P 31 2 1                           | P 31 2 1                                               |
| Cell Dimensions                                   |                                    |                                                        |
| $a, b, c$ (Å)                                     | 66.2 66.2 127.9                    | 66.2 66.2 127.2                                        |
| $\alpha, \beta, \gamma$ (°)                       | 90 90 120                          | 90 90 120                                              |
| Resolution range                                  | 27.96 - 1.5 (1.53 - 1.50)          | 34.09 - 1.85 (1.89 - 1.85)                             |
| R-merge                                           | 0.052 (0.329)                      | 0.0380 (0.2920)                                        |
| CC1/2                                             | 0.997 (0.654)                      | 0.998 (0.755)                                          |
| Mean I/sigma(I)                                   | 10.5 (2.3)                         | 17.2 (2.8)                                             |
| Completeness (%)                                  | 99.7 (97.4)                        | 99.7 (95.5)                                            |
| Multiplicity                                      | 1.9 (1.8)                          | 1.9 (1.7)                                              |
|                                                   |                                    |                                                        |
| <b>Refinement</b>                                 |                                    |                                                        |
| Resolution                                        | 27.98 - 1.5 (1.539 - 1.5)          | 34.12 - 1.85 (1.898 - 1.850)                           |
| Reflections used in refinement                    | 49887 (3567)                       | 26747 (1856)                                           |
| R-work/R-free                                     | 0.1291 (0.3270)/0.1711<br>(0.3740) | 0.1328 (0.2160)/0.1649<br>(0.2460)                     |
| Number of atoms                                   | 2438                               | 2271                                                   |
| macromolecules                                    | 1908                               | 1897                                                   |
| ligands                                           | 49                                 | 45                                                     |
| solvent                                           | 481                                | 329                                                    |
| Average B-factor                                  | 14.9                               | 15.8                                                   |
| macromolecules                                    | 9.7                                | 13.2                                                   |
| ligands                                           | 23.4                               | 18.7                                                   |
| solvent                                           | 34.6                               | 30.1                                                   |
| RMS (bonds, Å)                                    | 0.018                              | 0.015                                                  |
| RMS (angles, °)                                   | 2.039                              | 1.898                                                  |
